# Supplementary material for: Novel fatty acyl apoE mimetic peptides have increased potency to reduce plasma cholesterol in mice and macaques
Source: PubMed Central journal article supplement (PMC6210918; doi:10.1194/jlr.m085985), 2018-09-10
Supplement: 10.1194_M085985_jlr.M085985-1.pdf [file 10.1194_M085985_jlr.M085985-1.pdf]

## Supplemental Data

### Novel Fatty Acyl ApoE Mimetic Peptides Have Increased Potency To Reduce Plasma Cholesterol In Mice And Macaques

Gattadahalli M. Anantharamaiah, David W. Garber, Dennis Goldberg, Eric Morrel, Geeta Datta, Mayakonda Palgunachari, Thomas C. Register, Susan E. Appt, and C. Roger White

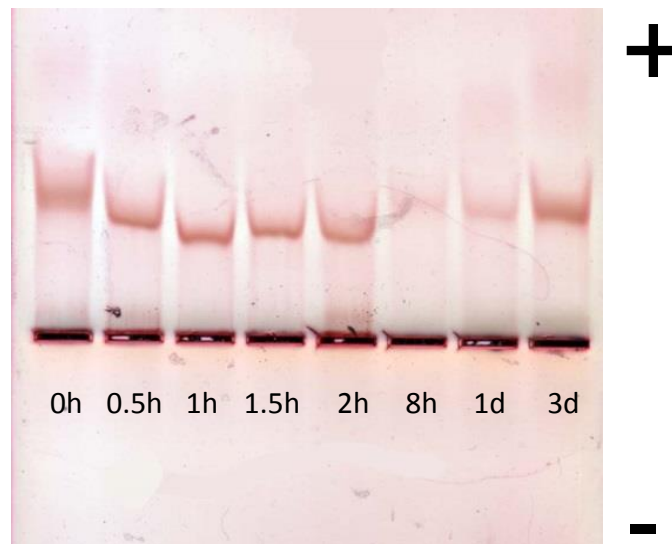

**Supplemental Figure S1: Myr-[R]hE18A-NH<sub>2</sub> retards the electrophoretic mobility of LDL isolated from cynomolgus monkeys.** Monkeys received an IV infusion of Myr-[R]hE18A-NH<sub>2</sub> (7.4mg/kg). Blood was collected at baseline and at time points up to 3d after peptide administration. Plasma samples were diluted with loading buffer containing 10% glycerol, loaded on an agarose gel, subjected to electrophoresis and stained with oil red O.

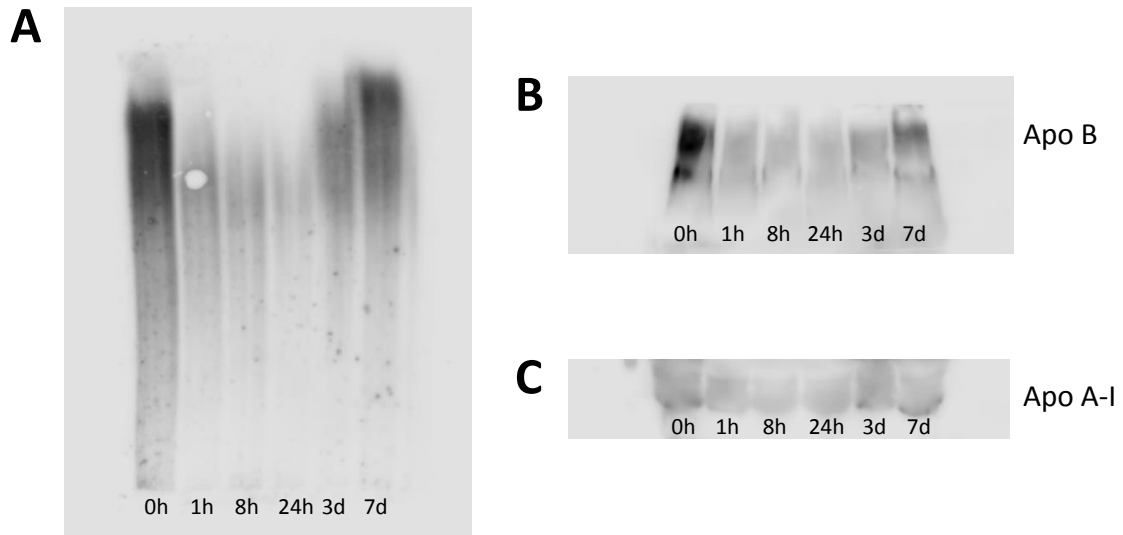

**Supplemental Figure S2: Effects of Myr-[R]hE18A-NH<sub>2</sub> on apolipoprotein levels in plasma of cynomolgus monkeys.** Plasma samples obtained at baseline and after injection of the peptide were loaded on an agarose gel. Proteins were transferred to nitrocellulose membranes and probed for apoB (**Panel A**). Plasma samples were also resolved on SDS gels. ApoB protein was reduced after peptide administration and returned to baseline after 7d (Panel B). A modest, but non-significant, reduction in apoA-I levels mirrored changes in plasma HDL levels over this time period (Panel C).

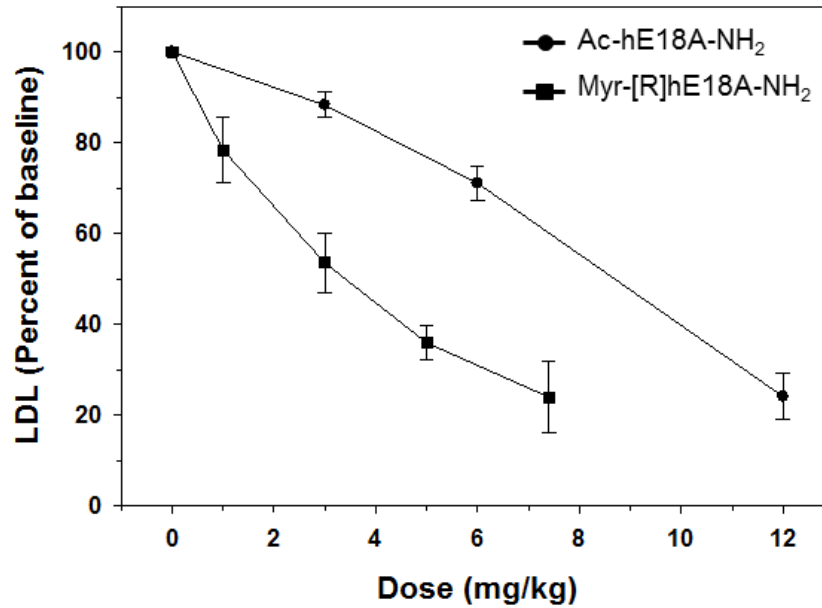

**Supplemental Figure S3: Myr-[R]hE18A-NH<sub>2</sub> is more potent than Ac-hE18A-NH<sub>2</sub> in reducing plasma LDL.** Plasma samples were collected from cynomolgus monkeys 24h after administration of Myr-[R]hE18A-NH<sub>2</sub> (0-7.4mg/kg) or Ac-hE18A-NH<sub>2</sub> (0-12mg/kg). 7.4mg/kg Myr-[R]hE18A-NH<sub>2</sub> elicited an approximate 75% reduction in LDL while 12mg/kg Ac-hE18A-NH<sub>2</sub> was required for this response. N=4 per peptide dose.
